# Supplementary material
Source: HighWire-hosted journal article supplement (https://www.highwirestage.com/highwire/filestream/69383/field_highwire_adjunct_files/0/19-00150.pdf)
Supplement: 19-00150.pdf [file 19-00150.pdf]

**On-line Table 1: VR data obtained from a subset of ROI voxels<sup>a</sup>**

|                                                                                                                                 | WML       | Penumbra (0–2 mm) | Penumbra (2–4 mm) | NAWM             |
|---------------------------------------------------------------------------------------------------------------------------------|-----------|-------------------|-------------------|------------------|
| Mean No. of voxels in ROIs (SD)                                                                                                 | 774 (883) | 2919 (2371)       | 6087 (4412)       | 228,761 (38,395) |
| Mean No. of voxels for VR                                                                                                       | 229 (322) | 1075 (1253)       | 2258 (2736)       | 131,654 (66,139) |
| No. of voxels for VR above 20th percentile of all ROIs                                                                          | 223       | 377               | 425               | 456              |
| No. with >20% of ROI voxels used for VR calculation                                                                             | 260       | 324               | 361               | 399              |
| No. of ROIs with No. of voxels for VR above 20th percentile of all ROIs and with >20% of ROI voxels used for VR calculation (%) | 187 (40)  | 315 (68)          | 358 (77)          | 399 (86)         |

<sup>a</sup> Twentieth percentile, corresponding to a total of 123 activated voxels, was calculated from all 4 ROIs from all subjects. The majority of voxels below this threshold were in WMLs. The majority of subjects have either a low number of voxels used for VR calculation or a low percentage of total voxels contributing to the VR calculation.

**On-line Table 2: Ordinary least-squares modeling for associations between imaging parameters and number of cardiovascular risk factors (RF<sub>score</sub>), adjusting for site, age, sex, and race<sup>a</sup>**

|       | WML         |       |         | Penumbra (0–2 mm) |       |         | Penumbra (2–4 mm) |       |         |
|-------|-------------|-------|---------|-------------------|-------|---------|-------------------|-------|---------|
|       | Coefficient | SE    | P Value | Coefficient       | SE    | P Value | Coefficient       | SE    | P Value |
| T1    | −0.0009     | 0.021 | NS      | 0.47              | 0.019 | NS      | 0.053             | 0.015 | NS      |
| T2    | 0.034       | 0.021 | NS      | 0.12              | 0.016 | NS      | 0.0062            | 0.011 | NS      |
| FLAIR | 0.012       | 0.015 | NS      | 0.0098            | 0.06  | NS      | 0.086             | 0.00  | NS      |
| CBF   | −0.15       | 0.48  | .0003   | −0.13             | 0.042 | .042    | −0.012            | 0.040 | .002    |
| FA    | 0.0155      | 0.047 | NS      | 0.0043            | 0.34  | NS      | 0.039             | 0.32  | NS      |
| MD    | 0.032       | 0.050 | NS      | 0.012             | 0.033 | NS      | 0.0003            | 0.026 | NS      |
| VR    | −0.014      | 0.061 | NS      | 0.046             | 0.047 | NS      | 0.073             | 0.040 | .07     |

**Note:**—NS indicates not significant; SE, standard error.

<sup>a</sup> Only CBF shows significant associations with the RF<sub>score</sub>. Values are coefficient ± SE with unadjusted P values.

**On-line Table 3: Ordinary least-squares modeling for associations between imaging parameters and individual cardiovascular risk factors<sup>a</sup>**

|                   | Smoking     |       |         | BMI         |       |         | Sedentary   |       |         |
|-------------------|-------------|-------|---------|-------------|-------|---------|-------------|-------|---------|
|                   | Coefficient | SE    | P Value | Coefficient | SE    | P Value | Coefficient | SE    | P Value |
| WML               |             |       |         |             |       |         |             |       |         |
| T1                |             |       |         |             |       |         | −0.0422     | 0.021 | .045    |
| T2                |             |       |         |             |       |         | 0.0523      | 0.02  | .013    |
| CBF               | −0.2343     | 0.097 | .016    | −0.124      | 0.05  | .013    |             |       |         |
| VR                | −0.2606     | 0.123 | .034    |             |       |         |             |       |         |
| Penumbra (0–2 mm) |             |       |         |             |       |         |             |       |         |
| T1                | 0.0829      | 0.038 | .028    |             |       |         |             |       |         |
| CBF               |             |       |         | −0.1327     | 0.043 | .002    |             |       |         |
| MD                | −0.1367     | 0.068 | .044    |             |       |         |             |       |         |
| Penumbra (2–4 mm) |             |       |         |             |       |         |             |       |         |
| T1                | 0.0723      | 0.029 | .014    |             |       |         |             |       |         |
| CBF               |             |       |         | −0.1398     | 0.041 | .001    |             |       |         |
| MD                | −0.1331     | 0.052 | .011    |             |       |         |             |       |         |
| VR                |             |       |         |             |       |         | 0.0948      | 0.04  | .018    |

<sup>a</sup> Models were adjusted for site, age, sex, and race. Associations between all imaging parameters (T1, T2, FLAIR, MD, FA, CBF, and VR) and six cardiovascular risk factors (hypertension, hypercholesterolemia, diabetes, BMI, sedentary behavior, and smoking history) were evaluated, but only significant parameters from the models are shown. Coefficients for all other parameters and risk factors were not significant and are not shown.

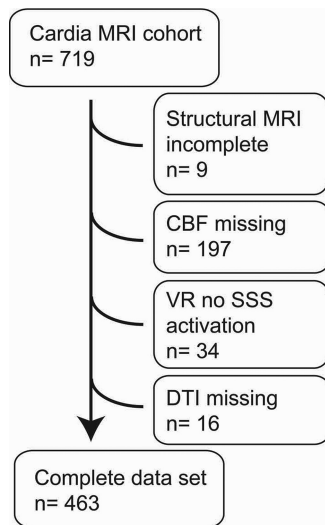

**ON-LINE FIG 1.** Only subjects with all MR imaging parameters available are included for analysis. CBF data from 1 CARDIA study site were technically inadequate and could not be processed, leading to the largest exclusion of subjects.

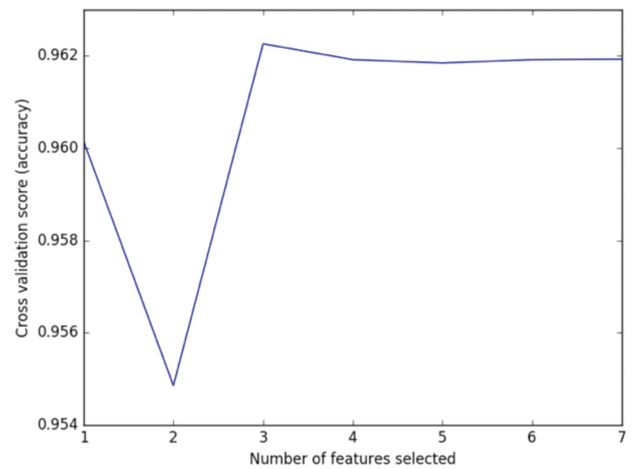

**ON-LINE FIG 3.** Cross-validation scores as a function of number of features selected.

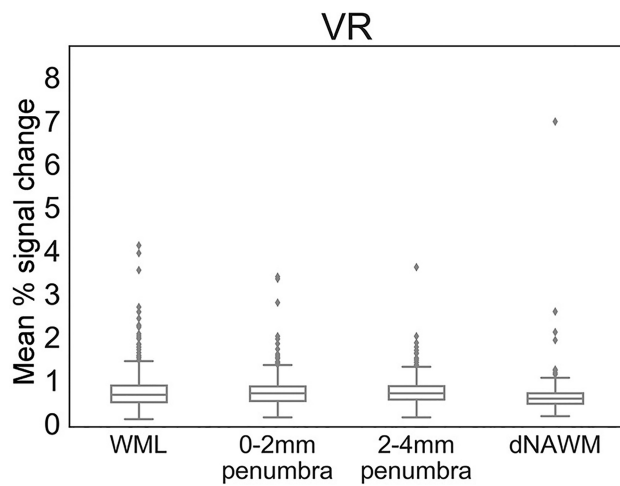

**ON-LINE FIG 2.** Boxplots of mean percentage change of vascular reactivity for each region, with outliers included.
